# Supplementary material for: Differential microRNA Expression Analysis in Patients with HPV-Infected Ovarian Neoplasms
Source: MDPI journal article supplement (doi:10.3390/ijms25020762), 2024-01-07
Supplement: s1 [file s1]

**Supplementary Table S4.** Differential expression analysis between patients with HGSOC and non-HGSOC tumors.

| Material | miRNA           | HGSOC<br>mean | HGSOC<br>SD | non-HGSOC<br>mean | non-HGSOC<br>SD | FC   | log2FC | <i>p</i> -value | <i>p</i> -value BH <sup>a</sup> |
|----------|-----------------|---------------|-------------|-------------------|-----------------|------|--------|-----------------|---------------------------------|
| Tumor    | hsa-miR-218-5p  | -1.38         | 1.24        | -2.69             | 1.61            | 2.48 | 1.31   | 0.0166          | 0.1830                          |
|          | hsa-miR-34a-5p  | -0.22         | 1.20        | 0.41              | 0.94            | 0.65 | -0.63  | 0.0690          | 0.2557                          |
|          | hsa-miR-21-5p   | 5.91          | 1.01        | 6.52              | 0.95            | 0.66 | -0.60  | 0.0697          | 0.2557                          |
|          | hsa-miR-200a-3p | -0.47         | 2.13        | 0.27              | 1.32            | 0.60 | -0.74  | 0.1643          | 0.4517                          |
|          | hsa-miR-140-3p  | -1.09         | 1.50        | -0.67             | 1.20            | 0.75 | -0.42  | 0.3325          | 0.7315                          |
|          | hsa-miR-25-5p   | -7.23         | 1.02        | -7.44             | 0.93            | 1.15 | 0.21   | 0.5175          | 0.9488                          |
|          | hsa-miR-191-5p  | 1.14          | 0.74        | 1.07              | 0.61            | 1.05 | 0.07   | 0.7509          | 0.9780                          |
|          | hsa-miR-16-5p   | 3.80          | 0.80        | 3.74              | 1.03            | 1.04 | 0.06   | 0.8584          | 0.9780                          |
|          | hsa-miR-203a-3p | -1.18         | 1.46        | -1.23             | 1.51            | 1.04 | 0.05   | 0.9139          | 0.9780                          |
|          | hsa-miR-9-5p    | -4.32         | 1.84        | -4.36             | 1.44            | 1.03 | 0.04   | 0.9405          | 0.9780                          |
|          | hsa-let-7b-5p   | 2.27          | 1.27        | 2.28              | 1.26            | 0.99 | -0.01  | 0.9780          | 0.9780                          |
| Serum    | hsa-miR-16-5p   | 4.88          | 2.11        | 4.61              | 1.34            | 1.20 | 0.26   | 0.6908          |                                 |
|          | hsa-miR-21-5p   | 2.39          | 1.15        | 2.07              | 1.06            | 1.25 | 0.32   | 0.4886          |                                 |
|          | hsa-miR-34a-5p  | -4.82         | 2.01        | -4.44             | 2.11            | 0.77 | -0.39  | 0.6604          |                                 |
|          | hsa-miR-191-5p  | -1.12         | 1.14        | -0.97             | 0.70            | 0.90 | -0.15  | 0.6720          |                                 |
|          | hsa-let-7b-5p   | -0.78         | 0.53        | -0.59             | 0.67            | 0.88 | -0.19  | 0.4775          |                                 |
|          | hsa-miR-140-3p  | -0.54         | 0.50        | -0.68             | 0.68            | 1.11 | 0.15   | 0.5861          |                                 |

HGSOC: high-grade serous ovarian carcinoma; hsa-miR: *Homo sapiens* microRNA; SD: standard deviation; FC: fold change; BH: Benjamini–Hochberg (BH) correction. <sup>a</sup>significant at the 0.05 level by two-sided independent Student's t-test (corrected using the Benjamini–Hochberg correction for multiple comparisons).
