# Supplementary material for: Differential microRNA Expression Analysis in Patients with HPV-Infected Ovarian Neoplasms
Source: MDPI journal article supplement (doi:10.3390/ijms25020762), 2024-01-07
Supplement: s1 [file s1]

**Supplementary Table S1.** Detailed comparisons of miRNAs expression in ovarian tumors between identified clusters of samples.

| miRNA           | "Green" cluster |      | "Orange" cluster |      | "Red" cluster |      | ANOVA<br><i>p</i> -value | "Green" vs<br>"Orange" | "Green" vs<br>"Red" | "Orange" vs<br>"Red" |
|-----------------|-----------------|------|------------------|------|---------------|------|--------------------------|------------------------|---------------------|----------------------|
|                 | Mean            | SD   | Mean             | SD   | Mean          | SD   |                          | <i>p</i> -value        | <i>p</i> -value     | <i>p</i> -value      |
| hsa-miR-21-5p   | 5.34            | 0.64 | 6.25             | 1.23 | 6.56          | 0.80 | 0.0009                   | 0.0293                 | 0.0009              | 0.6163               |
| hsa-miR-191-5p  | 1.07            | 0.89 | 1.09             | 0.42 | 1.17          | 0.71 | 0.9018                   |                        |                     |                      |
| hsa-miR-9-5p    | -3.40           | 1.41 | -3.41            | 1.59 | -5.65         | 1.08 | 0.0000                   | 0.9998                 | 0.0002              | 0.0002               |
| hsa-miR-16-5p   | 3.42            | 0.55 | 4.25             | 0.88 | 3.78          | 0.95 | 0.0438                   | 0.034                  | 0.4284              | 0.2784               |
| hsa-miR-25-5p   | -6.40           | 1.02 | -7.97            | 0.72 | -7.56         | 0.52 | 0.0000                   | 0.0001                 | 0.0003              | 0.3124               |
| hsa-miR-34a-5p  | -0.90           | 0.86 | 0.16             | 1.44 | 0.51          | 0.73 | 0.0007                   | 0.0236                 | 0.0006              | 0.6123               |
| hsa-miR-200a-3p | 0.69            | 0.90 | -2.90            | 1.70 | 0.66          | 0.91 | 0.0000                   | 0.0001                 | 0.9973              | 0.0001               |
| hsa-miR-203a-3p | -0.41           | 1.30 | -2.47            | 1.17 | -1.01         | 1.22 | 0.0004                   | 0.0004                 | 0.3485              | 0.007                |
| hsa-miR-218-5p  | -1.75           | 1.32 | -0.96            | 1.33 | -2.25         | 1.51 | 0.0546                   |                        |                     |                      |
| hsa-let-7b-5p   | 1.19            | 0.71 | 3.81             | 0.74 | 2.15          | 0.78 | 0.0000                   | 0.0001                 | 0.0017              | 0.0001               |
| hsa-miR-140-3p  | -1.89           | 0.71 | 0.82             | 0.58 | -1.37         | 1.21 | 0.0000                   | 0.0001                 | 0.2519              | 0.0001               |

hsa-miR: *Homo sapiens* microRNA; SD: standard deviation.
