# Supplementary material for: Differential microRNA Expression Analysis in Patients with HPV-Infected Ovarian Neoplasms
Source: MDPI journal article supplement (doi:10.3390/ijms25020762), 2024-01-07
Supplement: s1 [file s1]

**Supplementary Table S2.** Differential expression analysis of miRNAs in serum samples between patients with HPV16/18 and without viral infection.

| miRNA          | HPV-<br>positive<br>mean | HPV-<br>positive<br>SD | HPV-<br>negative<br>mean | HPV-<br>negative<br>SD | FC   | log2FC | <i>p</i> -value |
|----------------|--------------------------|------------------------|--------------------------|------------------------|------|--------|-----------------|
| hsa-miR-21-5p  | 2.45                     | 1.06                   | 2.00                     | 1.24                   | 1.36 | 0.45   | 0.3393          |
| hsa-miR-191-5p | -1.20                    | 0.79                   | -0.85                    | 1.45                   | 0.78 | -0.35  | 0.4873          |
| hsa-let-7b-5p  | -0.82                    | 0.59                   | -0.56                    | 0.47                   | 0.84 | -0.25  | 0.2139          |
| hsa-miR-140-3p | -0.62                    | 0.62                   | -0.49                    | 0.34                   | 0.91 | -0.13  | 0.4576          |
| hsa-miR-16-5p  | 4.94                     | 1.65                   | 4.53                     | 2.48                   | 1.32 | 0.41   | 0.6469          |
| hsa-miR-34a-5p | -4.76                    | 1.91                   | -4.64                    | 2.30                   | 0.92 | -0.12  | 0.8888          |

Abbreviations: HPV, human papillomavirus, HPV16 and/or HPV18; FC, fold change; SD, standard deviation; hsa-miR, *homo sapiens* microRNA.
