# Supplementary material for: Differential microRNA Expression Analysis in Patients with HPV-Infected Ovarian Neoplasms
Source: MDPI journal article supplement (doi:10.3390/ijms25020762), 2024-01-07
Supplement: s1 [file s1]

**Supplementary Table S3.** Differential expression analysis between higher-stage (III/IV) according to FIGO versus lower-stage (I/II) in patients with ovarian neoplasms.

| Material | miRNA           | higher stage<br>mean | higher stage<br>SD | lower stage<br>mean | lower stage<br>SD | FC   | log2FC | p-value | p-value BH <sup>a</sup> |
|----------|-----------------|----------------------|--------------------|---------------------|-------------------|------|--------|---------|-------------------------|
| Tumor    | hsa-miR-218-5p  | -1.38                | 1.26               | -3.64               | 1.12              | 4.77 | 2.25   | 0.0009  | 0.0104                  |
|          | hsa-miR-191-5p  | 1.02                 | 0.70               | 1.64                | 0.57              | 0.65 | -0.61  | 0.0305  | 0.1680                  |
|          | hsa-let-7b-5p   | 2.36                 | 1.23               | 1.49                | 1.01              | 1.83 | 0.87   | 0.0706  | 0.2588                  |
|          | hsa-miR-200a-3p | -0.36                | 2.05               | 0.56                | 1.09              | 0.53 | -0.92  | 0.1007  | 0.2769                  |
|          | hsa-miR-203a-3p | -1.26                | 1.48               | -0.60               | 1.21              | 0.63 | -0.66  | 0.2322  | 0.5108                  |
|          | hsa-miR-9-5p    | -4.32                | 1.84               | -4.70               | 0.65              | 1.30 | 0.38   | 0.3366  | 0.5454                  |
|          | hsa-miR-34a-5p  | -0.13                | 1.20               | 0.25                | 0.88              | 0.77 | -0.38  | 0.3470  | 0.5454                  |
|          | hsa-miR-140-3p  | -1.06                | 1.47               | -0.78               | 1.03              | 0.82 | -0.28  | 0.5515  | 0.7583                  |
|          | hsa-miR-16-5p   | 3.82                 | 0.80               | 3.64                | 1.24              | 1.14 | 0.18   | 0.7171  | 0.8147                  |
|          | hsa-miR-25-5p   | -7.30                | 1.01               | -7.16               | 0.99              | 0.91 | -0.14  | 0.7431  | 0.8147                  |
|          | hsa-miR-21-5p   | 6.09                 | 1.06               | 6.17                | 0.87              | 0.94 | -0.09  | 0.8147  | 0.8147                  |
| Serum    | hsa-miR-16-5p   | 4.76                 | 1.98               | 5.08                | 2.02              | 0.80 | -0.32  | 0.7548  |                         |
|          | hsa-miR-21-5p   | 2.39                 | 1.10               | 1.94                | 1.38              | 1.36 | 0.45   | 0.5246  |                         |
|          | hsa-miR-34a-5p  | -4.88                | 1.96               | -4.44               | 2.33              | 0.74 | -0.44  | 0.7078  |                         |
|          | hsa-miR-191-5p  | -1.00                | 1.08               | -1.27               | 0.85              | 1.21 | 0.27   | 0.5568  |                         |
|          | hsa-let-7b-5p   | -0.78                | 0.58               | -0.56               | 0.53              | 0.86 | -0.22  | 0.4253  |                         |
|          | hsa-miR-140-3p  | -0.48                | 0.49               | -0.75               | 0.46              | 1.21 | 0.27   | 0.2734  |                         |

FIGO: International Federation of Gynecology and Obstetrics; hsa-miR: *Homo sapiens* microRNA; SD: standard deviation; FC: fold change; BH: Benjamini–Hochberg (BH) correction. <sup>a</sup>significant at the 0.05 level by two-sided independent Student's t-test (corrected using the Benjamini–Hochberg correction for multiple comparisons).
